# Supplementary material
Source: PubMed Central journal article supplement (PMC6306190)
Supplement: CJHP-71-356-s001.pdf [file CJHP-71-356-s001.pdf]

**Appendix 1:** Structured medication review form used by clinical pharmacists in the Acute Care for Elders units at Vancouver General Hospital. © 2015 Vancouver General Hospital. Reproduced by permission.

|                      |              |                                   |             |
|----------------------|--------------|-----------------------------------|-------------|
| <b>HISTORY SHEET</b> |              | <b>CHOOSING WISELY Initiative</b> |             |
| Site:                |              | Date 11/2/2015                    |             |
| MRN                  | 999999999    | Hospital                          | SPH         |
| Patient Name         | Patient Name | Program/Ward                      | Medicine    |
| Date of Birth        | 4/7/2016     | Most Responsible Physician        | Doctor.name |

**Pharmacist Medication Review**

**Patient Identification and Relevant History**  
 Notes on patient history

**Medication Review and Recommendations**

Obtained From:

- PharmaNet  
  Patient  
  Caregiver  
  Family  
  Physician  
  Other  
 Notes - Other

| Drug                    | Regimen | Indication                   | Recommendation                  |
|-------------------------|---------|------------------------------|---------------------------------|
| Piperacillin/Tazobactam | BDDD    | Could also type free text    | Change duration to:1            |
| Atenolol                |         | Other: Cdif                  | Change formulation to:2         |
| Baclofen                |         | T2DM                         | Change regimen to:3             |
| Cefoxitin               |         | Prolonged QTC                | Consult specialty service:4     |
| Digoxin                 |         | Chronic Renal disease        | Decrease dose to:5              |
| Folic acid              |         | Acute kidney injury          | Discontinue drug 6              |
| Fentanyl                |         | Depression                   | Formulation change to: 7        |
| Haloperidol             |         | Electrolyte disturbance      | Increase dose to: 8             |
| Aripiprazole            |         | Venous thromboembolism       | Initiate drug: 9                |
| Linezolid               | 4Q2     | Delirium                     | Order lab test(s): 10           |
| Meperidine              |         | Chronic pain                 | Pharmacare special authority 11 |
| Naloxone                |         | Acute MI                     | Regimen change to: 12           |
| Salbutamol              |         | Heart failure                | Change duration to: 13          |
| Vancomycin              |         | Arthritis                    | Change formulation to: 14       |
| Tacrolimus              | 5hq1    | B12/folate deficiency anemia | Change regimen to: 15           |

Supplementary material for Chan WWT, Dahri K, Partovi N, Egan G, Yousefi V. Evaluation of collaborative medication reviews for high-risk older adults. *Can J Hosp Pharm.* 2018;71(6):356-63.
